# Supplementary material for: Reduced Expression of Autophagy Markers and Expansion of Myeloid-Derived Suppressor Cells Correlate With Poor T Cell Response in Severe COVID-19 Patients
Source: Front Immunol. 2021 Feb 22;12:614599. doi: 10.3389/fimmu.2021.614599 (PMC7937809; doi:10.3389/fimmu.2021.614599)
Supplement: Supplementary file 2 [file DataSheet_2.pdf]

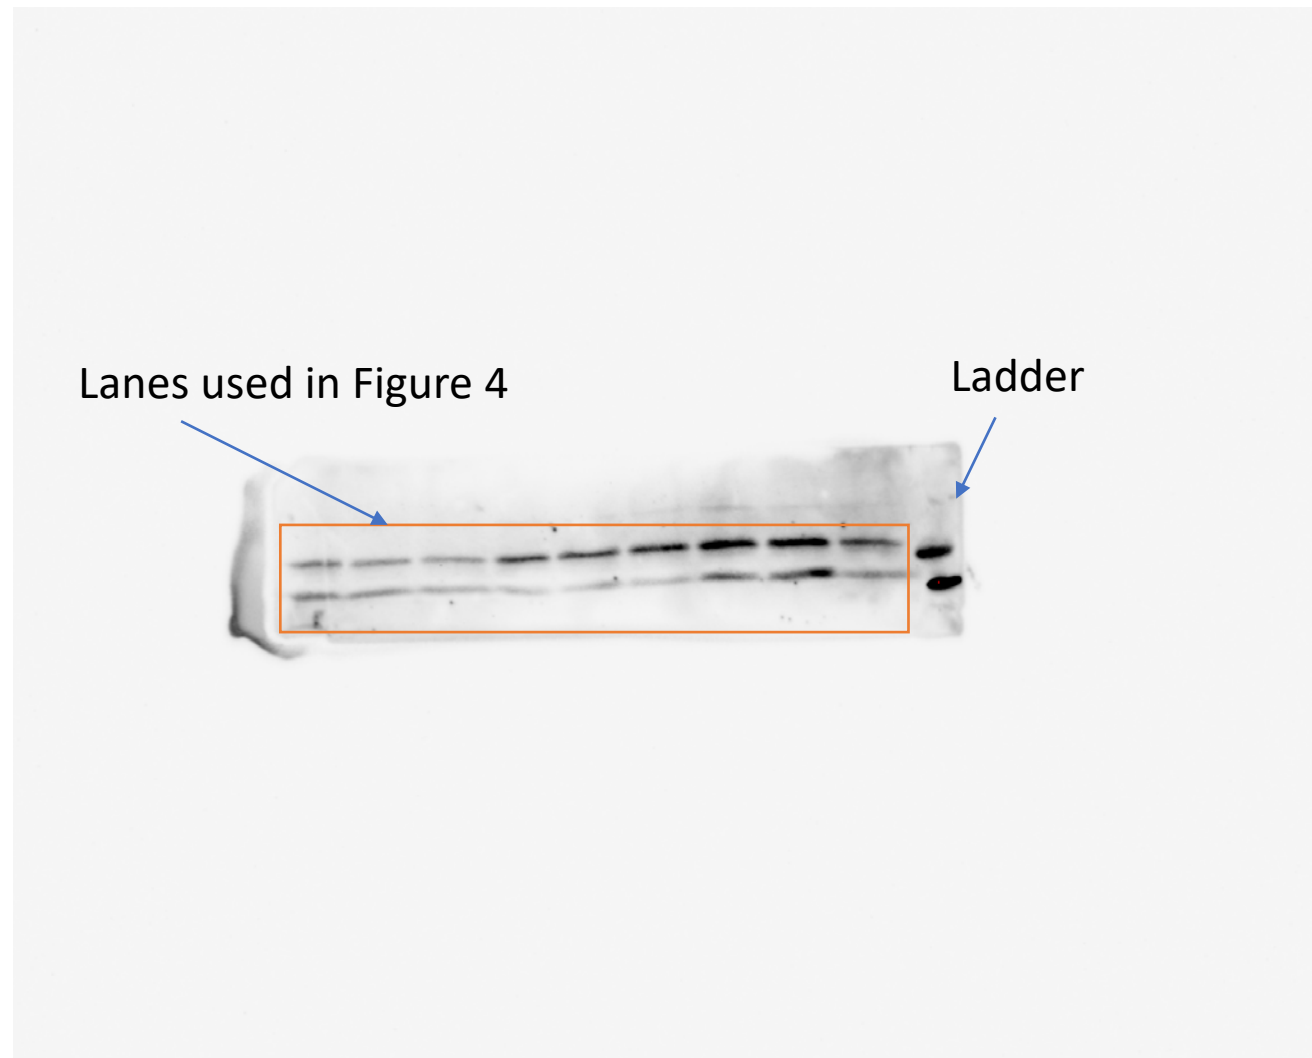

Full unedited gel for Figure 4B.

Staining was performed with anti-human LC3 Ab (1:2000, Invitrogen, PA1-16930) followed by goat anti-rabbit HRP-conjugated IgG H&L Ab (1:10000 Thermo Scientific)

Lanes used in Figure 4

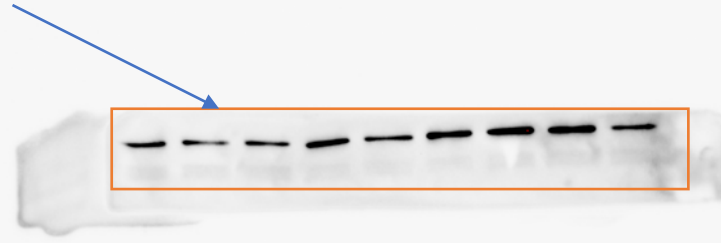

Full unedited gel for Figure 4B.

Staining was performed with anti-human GAPDH Ab (1:2000, Abcam, ab9484) followed by goat anti-mouse HRP-conjugated IgG H&L Ab (1:10000 Amersham Biosciences)

# Full unedited gels for Supplement Figure 5.

Lanes used in  
Supplement Figure 5  
First row

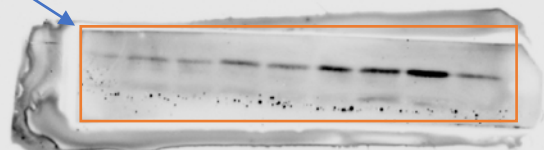

Lanes used in  
Supplement Figure 5  
Second row

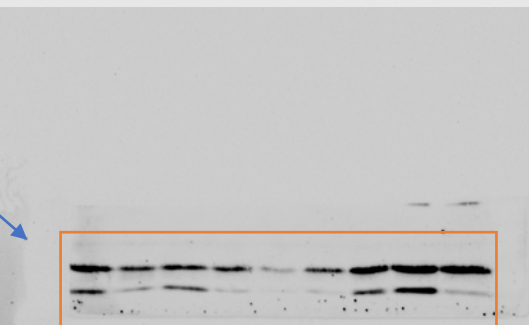

Lanes used in  
Supplement Figure 5  
Third row

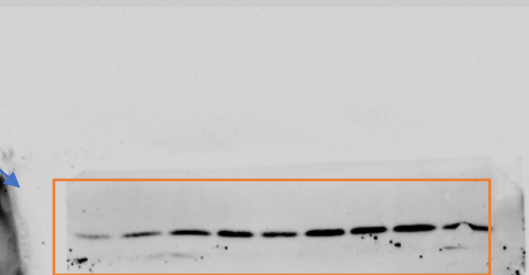

**LC3 staining as  
indicated on slide 1**

Lanes used in  
Supplement Figure 5  
First row

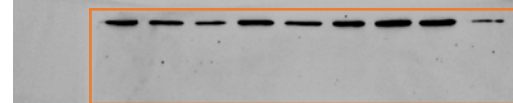

Lanes used in  
Supplement Figure 5  
Second row

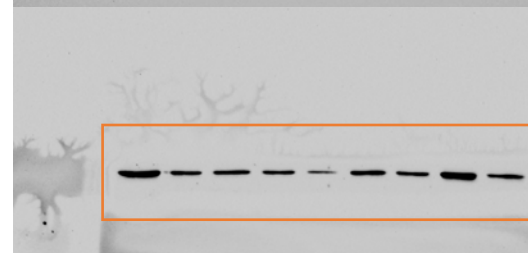

Lanes used in  
Supplement Figure 5  
Third row

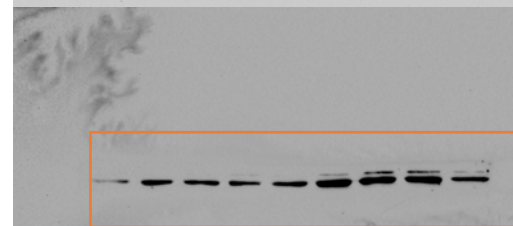

**GAPDH staining as  
indicated on slide 2**
